# Supplementary material
Source: PubMed Central journal article supplement (PMC3793663)
Supplement: Supp_Fig1.pdf [file Supp_Fig1.pdf]

## Supplementary Data

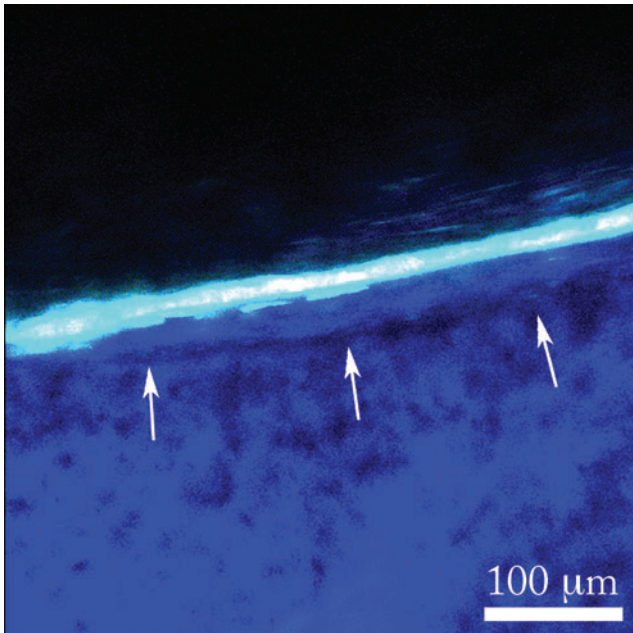

**SUPPLEMENTARY FIG. S1.** Host osteoblasts deposit mineral at the defect edge. At the edge of the defect, indicated by the gap in the second harmonic signal (white arrows), Col3.6cyan host osteoblasts overlie a dense second harmonic signal from the newly formed woven bone.
