# Supplementary material
Source: PubMed Central journal article supplement (PMC3793663)
Supplement: Supp_Fig2.pdf [file Supp_Fig2.pdf]

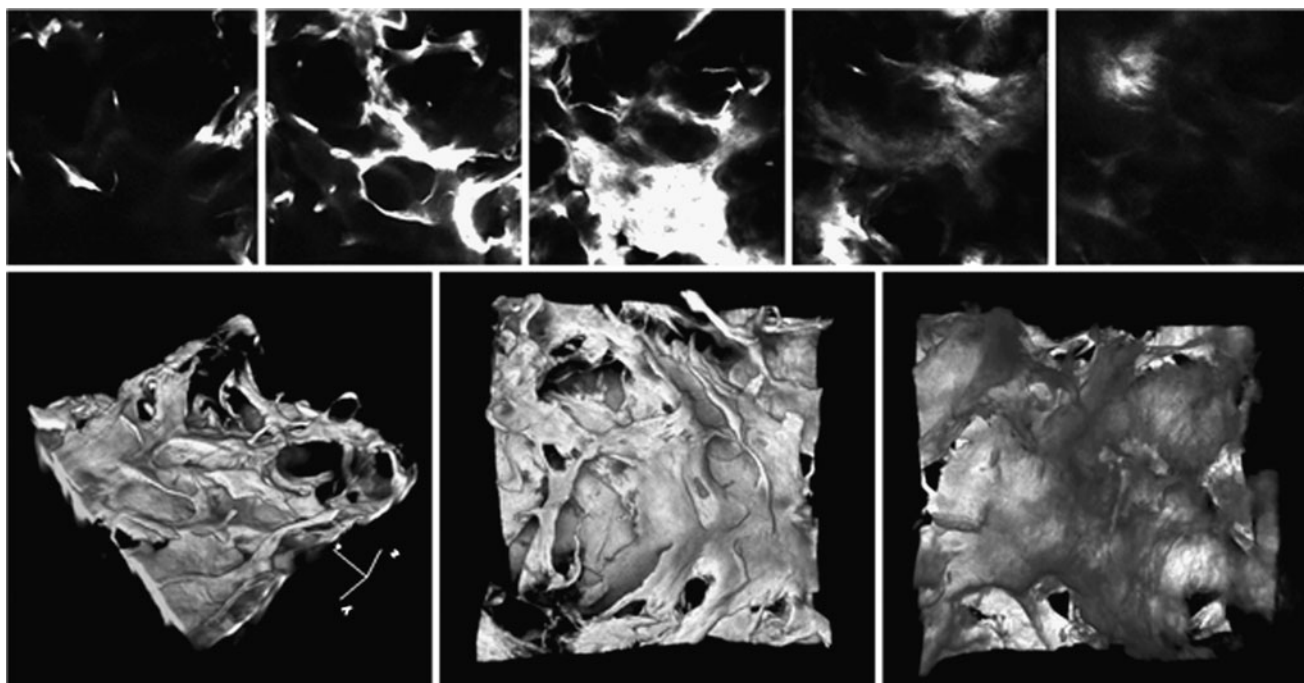

**SUPPLEMENTARY FIG. S2.** Imaging a collagen-based scaffold by its second harmonic signal. The collagen-hydroxyapatite scaffold made in-house, in a hydrated form, and imaged by the second harmonic signal. Top row: sequential slices through a z-stack of the surface of the scaffold. Bottom row: Isometric, top, and bottom view of the corresponding three-dimensional reconstruction.
