# Supplementary material
Source: PubMed Central journal article supplement (PMC3793663)
Supplement: Supp_Fig3.pdf [file Supp_Fig3.pdf]

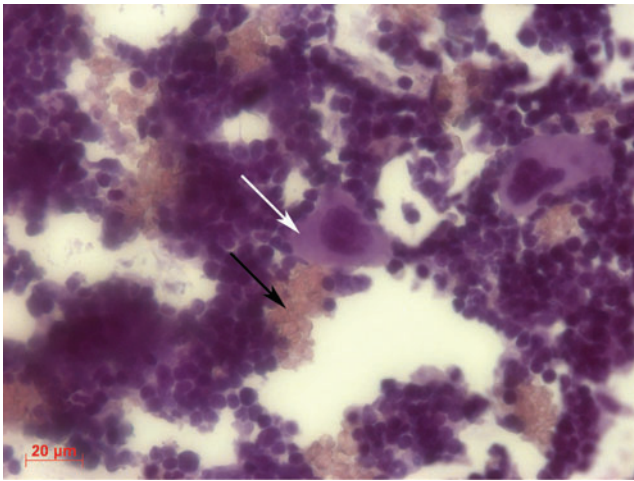

**SUPPLEMENTARY FIG. S3.** Bone marrow in implant core produced red blood cells. Magnification of the marrow region from a section stained with hematoxylin. Megakaryocyte (white arrow) and red blood cells (black arrow).
